# Supplementary material for: Compositional and Functional Shifts in the Epibiotic Bacterial Community of Shinkaia crosnieri Baba & Williams (a Squat Lobster from Hydrothermal Vents) during Methane-Fed Rearing
Source: PubMed Central journal article supplement (PMC6308002; doi:10.1264/jsme2.me18072), 2018-10-17
Supplement: 33_348_s1.pdf [file 33_348_s1.pdf]

1 **Fig. S1.** Illustration of the methane-fed rearing system. The concentration of dissolved oxygen in  
2 seawater was controlled by a dissolved oxygen electrode (A), dissolved oxygen meter (B), and air  
3 pump (C). The concentration of dissolved methane in seawater was controlled by a methane gas  
4 cylinder (D), pressure regulator (E), water pump (F), pre-filter (G), and hollow fiber module (H).  
5 White arrows indicate the direction of gas flow. Black arrows indicate the direction of water flow.

6

7 **Fig. S2.** Phylogenetic tree based on epibiotic 16S rRNA gene sequences. The sequence of the 16S  
8 rRNA gene from *Aquifex aeolicus* was defined as an outgroup. Representative sequences obtained  
9 from the *S. crosnieri* epibiotic community in this study are shown in blue. Sequences of the bacterial  
10 strains isolated from the *S. crosnieri* epibiotic community after rearing for 12 months are shown in red.  
11 A bootstrap analysis was performed with 1,000 resampled data sets. Bootstrap values >50% are shown  
12 at branch points. The scale bar indicates 0.09 substitutions per site.

13

14 **Fig. S3.** Electron micrographs of setae of *S. crosnieri* individuals during methane-fed rearing.  
15 Scanning electron micrographs (A and B) and a transmission electron micrograph (C) of setae  
16 dissected from *S. crosnieri* after rearing for 12 months are shown. Scale bars indicate 20  $\mu\text{m}$  (A), 5  $\mu\text{m}$   
17 (B), and 200 nm (C).

Dissolved oxygen  
controlling device

Dissolved methane  
controlling device

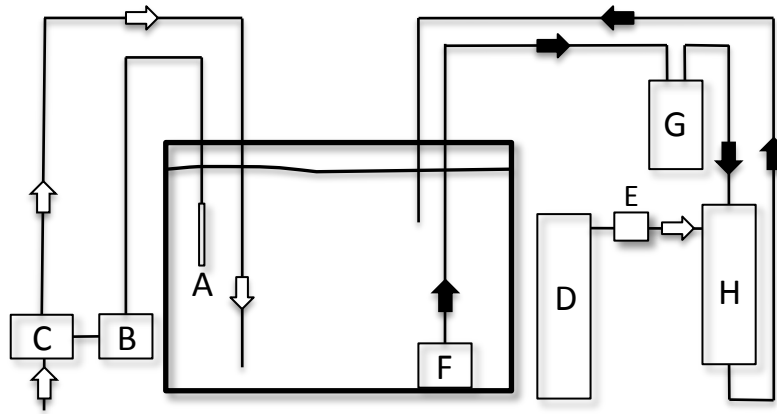

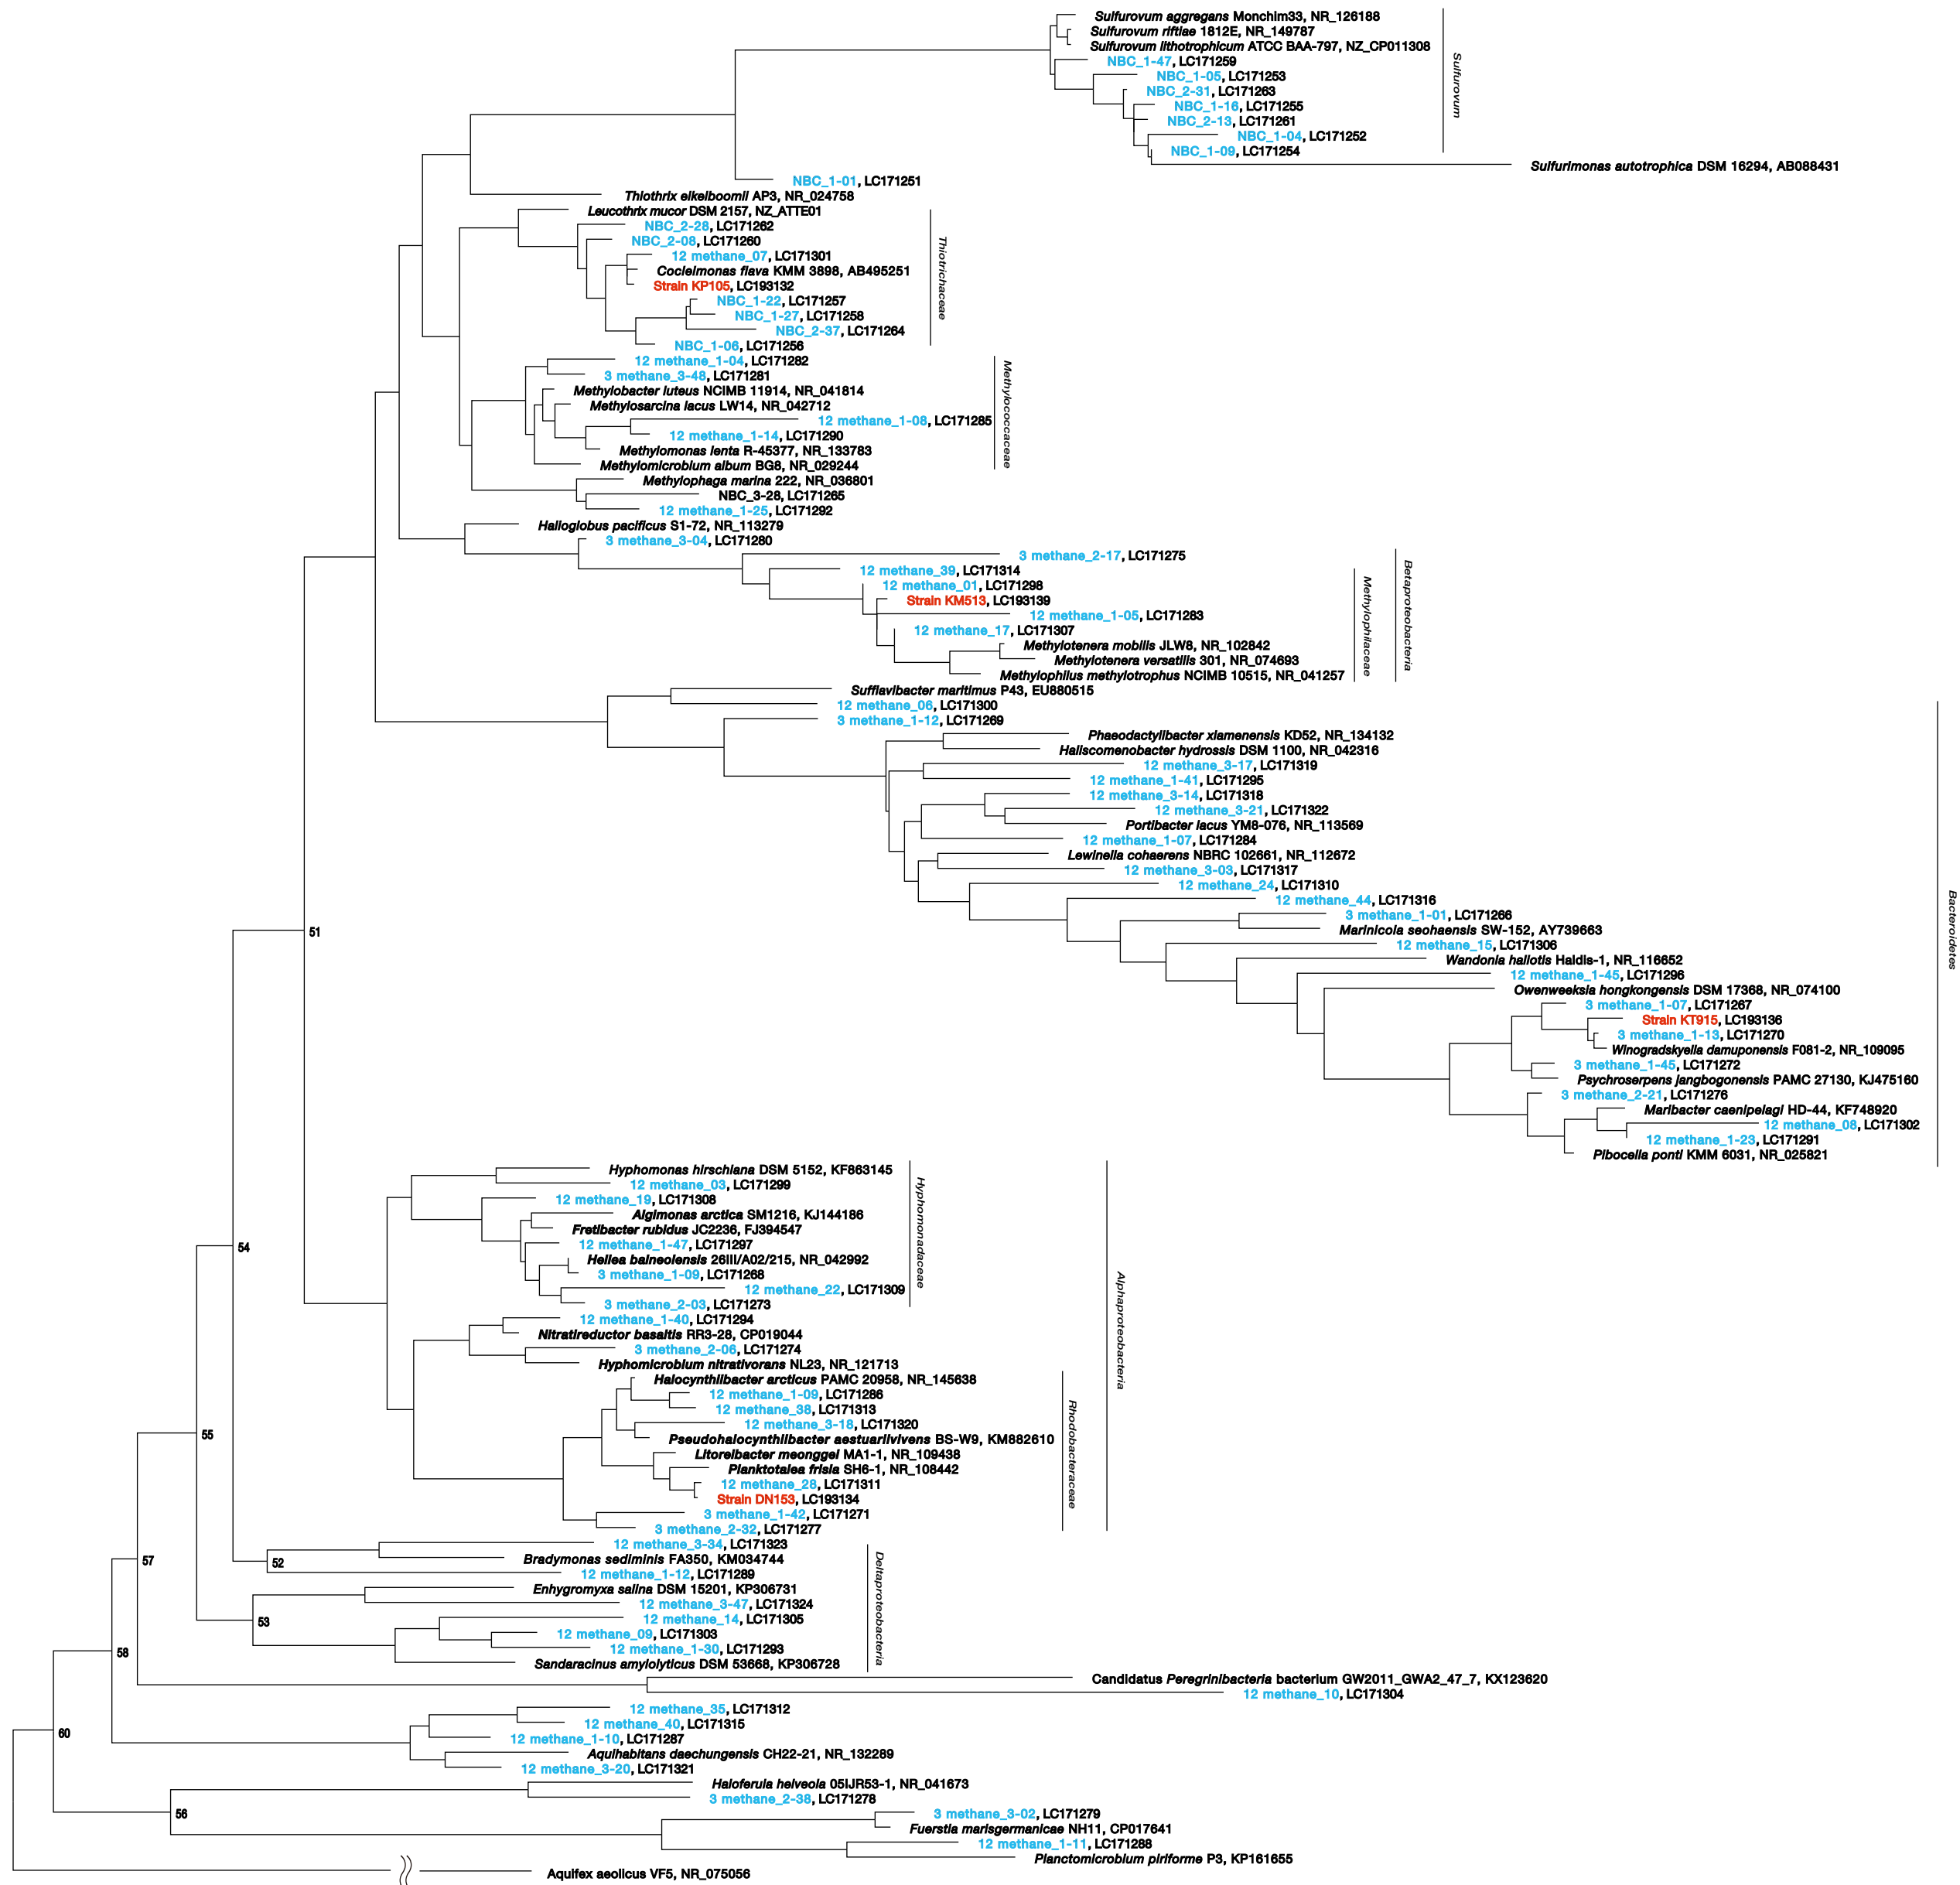

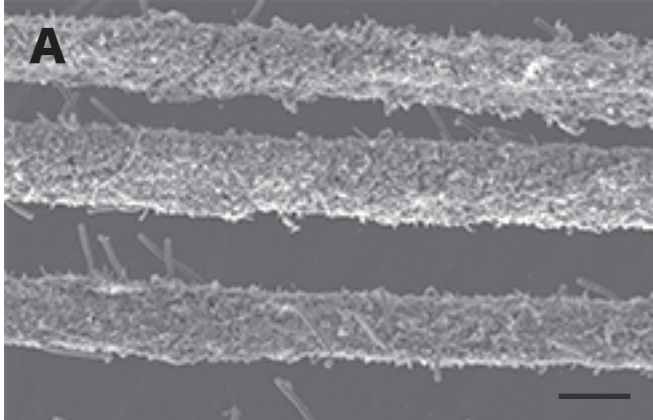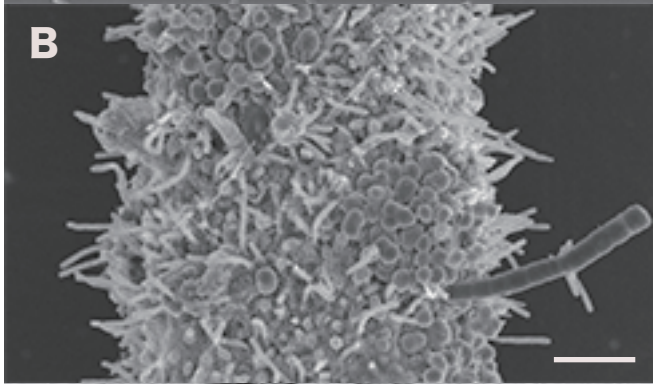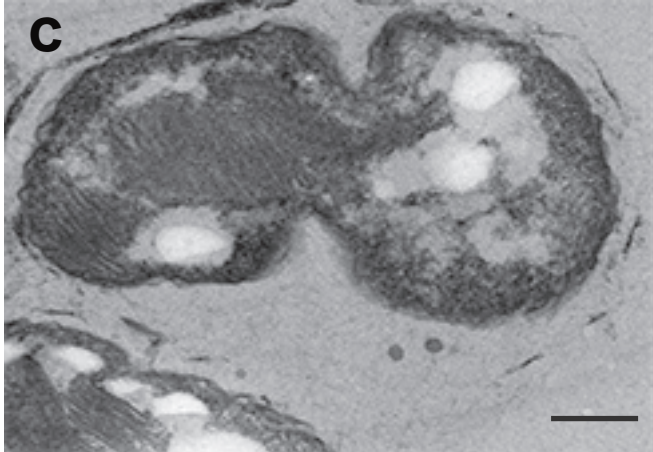

**Table S1:** Sequence similarity and compositions of bacterial phylotypes obtained from *S. crosnieri* epibiotic community.

| Group                        | Accession No. | Clones for the rearing periods (month) |    |    | Most similar sequence                   |               |       |
|------------------------------|---------------|----------------------------------------|----|----|-----------------------------------------|---------------|-------|
|                              |               | 0                                      | 3  | 12 | Source                                  | Accession No. | % sim |
| <i>Epsilonproteobacteria</i> |               |                                        |    |    |                                         |               |       |
| ( <i>Sulfurovum</i> )        |               |                                        |    |    |                                         |               |       |
| NBC_1-05                     | LC171253      | 5                                      | 0  | 0  | Inactive chimney from East Pacific Rise | JQ287048      | 97    |
| NBC_1-09                     | LC171254      | 25                                     | 0  | 0  | <i>S. crosnieri</i> epibiotic community | AB440170      | 99    |
| NBC_1-47                     | LC171259      | 7                                      | 0  | 0  | <i>S. crosnieri</i> epibiotic community | AB981871      | 99    |
| NBC_2-13                     | LC171261      | 2                                      | 0  | 0  | <i>S. crosnieri</i> epibiotic community | AB981795      | 99    |
| NBC_2-31                     | LC171263      | 2                                      | 0  | 0  | <i>K. puravida</i> epibiotic community  | JN255991      | 99    |
| NBC_1-04                     | LC171252      | 3                                      | 0  | 0  | <i>S. crosnieri</i> epibiotic community | AB981804      | 98    |
| NBC_1-16                     | LC171255      | 11                                     | 0  | 0  | <i>S. crosnieri</i> epibiotic community | AB981807      | 99    |
| <i>Gammaproteobacteria</i>   |               |                                        |    |    |                                         |               |       |
| ( <i>Thiotrichaceae</i> )    |               |                                        |    |    |                                         |               |       |
| 12 methane_07                | LC171301      | 1                                      | 7  | 17 | <i>Cocleimonas flava</i> KMM 3898       | AB495251      | 97    |
| NBC_1-06                     | LC171256      | 4                                      | 0  | 0  | <i>S. crosnieri</i> epibiotic community | EU107481      | 98    |
| NBC_1-22                     | LC171257      | 5                                      | 0  | 0  | <i>S. crosnieri</i> epibiotic community | AB476179      | 99    |
| NBC_2-28                     | LC171262      | 1                                      | 0  | 0  | <i>S. crosnieri</i> epibiotic community | AB980114      | 97    |
| NBC_2-37                     | LC171264      | 1                                      | 0  | 0  | <i>S. crosnieri</i> epibiotic community | AB981870      | 96    |
| NBC_1-27                     | LC171258      | 1                                      | 0  | 0  | <i>S. crosnieri</i> epibiotic community | AB981808      | 99    |
| NBC_2-08                     | LC171260      | 3                                      | 0  | 0  | <i>S. crosnieri</i> epibiotic community | AB981826      | 99    |
| ( <i>Methylococcaceae</i> )  |               |                                        |    |    |                                         |               |       |
| 12 methane_1-04              | LC171282      | 0                                      | 0  | 3  | <i>S. crosnieri</i> epibiotic community | AB980112      | 99    |
| 12 methane_1-14              | LC171290      | 7                                      | 21 | 4  | <i>S. crosnieri</i> epibiotic community | AB476240      | 97    |
| 12 methane_1-08              | LC171285      | 0                                      | 3  | 3  | <i>S. crosnieri</i> epibiotic community | AB981805      | 96    |
| 3 methane_3-48               | LC171281      | 0                                      | 1  | 0  | Carbonates from methane seep            | KM356316      | 99    |

|                                   |          |    |    |    |                                           |           |    |
|-----------------------------------|----------|----|----|----|-------------------------------------------|-----------|----|
| <i>(Piscirickettsiaceae)</i>      |          |    |    |    |                                           |           |    |
| 12 methane_1-25                   | LC171292 | 0  | 6  | 3  | Borehole on Costa Rica Rift flank         | GQ903367  | 98 |
| NBC_3-28                          | LC171265 | 1  | 0  | 0  | <i>S. crosnieri</i> epibiotic community   | AB981852  | 98 |
| <i>(Halieaceae)</i>               |          |    |    |    |                                           |           |    |
| 3 methane_3-04                    | LC171280 | 0  | 2  | 0  | Gut of <i>S. crosnieri</i>                | AB980096  | 95 |
| (Unclassified)                    |          |    |    |    |                                           |           |    |
| NBC_1-01                          | LC171251 | 19 | 0  | 0  | <i>S. crosnieri</i> epibiotic community   | EU107485  | 97 |
| <b><i>Alphaproteobacteria</i></b> |          |    |    |    |                                           |           |    |
| <i>(Hyphomonadaceae)</i>          |          |    |    |    |                                           |           |    |
| 12 methane_19                     | LC171308 | 0  | 0  | 1  | <i>Hyphomonadaceae</i> bacterium JC2234   | FJ394548  | 95 |
| 3 methane_1-09                    | LC171268 | 0  | 2  | 0  | <i>Hellea balneolensis</i>                | NR_042992 | 99 |
| 12 methane_1-47                   | LC171297 | 0  | 0  | 1  | Marine biofouling                         | GQ274221  | 96 |
| 3 methane_2-03                    | LC171273 | 0  | 2  | 0  | Marine biofouling                         | GQ274254  | 96 |
| 12 methane_22                     | LC171309 | 0  | 0  | 1  | Hydrothermal vent biofilm                 | KP896648  | 99 |
| 12 methane_03                     | LC171299 | 0  | 3  | 2  | Inactive chimney from East Pacific Rise   | JQ287328  | 95 |
| <i>(Hyphomicrobiaceae)</i>        |          |    |    |    |                                           |           |    |
| 3 methane_2-06                    | LC171274 | 0  | 1  | 0  | Seafloor lavas from the East Pacific Rise | EU491743  | 99 |
| <i>(Phyllobacteriaceae)</i>       |          |    |    |    |                                           |           |    |
| 12 methane_1-40                   | LC171294 | 0  | 0  | 1  | Inactive chimney from East Pacific Rise   | JQ287050  | 99 |
| <i>(Rhodobacteraceae)</i>         |          |    |    |    |                                           |           |    |
| 12 methane_28                     | LC171311 | 0  | 3  | 4  | <i>Planktotalea</i> sp. KHS07             | KP172216  | 99 |
| 12 methane_38                     | LC171313 | 0  | 0  | 1  | <i>S. crosnieri</i> epibiotic community   | AB981848  | 98 |
| 12 methane_1-09                   | LC171286 | 0  | 2  | 3  | <i>S. crosnieri</i> epibiotic community   | AB981848  | 98 |
| 12 methane_3-18                   | LC171320 | 0  | 0  | 1  | Sediment in arctic fjord                  | KJ566300  | 98 |
| 3 methane_1-42                    | LC171271 | 0  | 3  | 0  | <i>S. crosnieri</i> epibiotic community   | AB981886  | 99 |
| 3 methane_2-32                    | LC171277 | 0  | 1  | 0  | Mud volcano sediment in Mediterranean Sea | KF440308  | 99 |
| <b><i>Betaproteobacteria</i></b>  |          |    |    |    |                                           |           |    |
| <i>(Methylophilaceae)</i>         |          |    |    |    |                                           |           |    |
| 12 methane_01                     | LC171298 | 0  | 29 | 29 | Gut of ascidian <i>Ciona intestinalis</i> | KF799039  | 99 |
| 12 methane_1-05                   | LC171283 | 0  | 0  | 2  | Gut of ascidian <i>Ciona intestinalis</i> | KF799039  | 92 |

|                                   |          |   |   |    |                                                       |           |    |
|-----------------------------------|----------|---|---|----|-------------------------------------------------------|-----------|----|
| 12 methane_39                     | LC171314 | 0 | 0 | 1  | Bacterial community in acidification experiment       | JN976619  | 95 |
| 12 methane_17                     | LC171307 | 0 | 0 | 1  | Bacterial community co-existing with Pseudo-nitzschia | HM140666  | 99 |
| (Unclassified)                    |          |   |   |    |                                                       |           |    |
| 3 methane_2-17                    | LC171275 | 0 | 1 | 0  | Marine sponge                                         | EU236422  | 89 |
| <b><i>Deltaproteobacteria</i></b> |          |   |   |    |                                                       |           |    |
| ( <i>Bdellovibrionaceae</i> )     |          |   |   |    |                                                       |           |    |
| 12 methane_1-12                   | LC171289 | 0 | 0 | 3  | Microbial mat in hypersaline pond                     | JN430263  | 93 |
| ( <i>Bradymonadales</i> )         |          |   |   |    |                                                       |           |    |
| 12 methane_3-34                   | LC171323 | 0 | 0 | 1  | River sediment                                        | KM823720  | 90 |
| ( <i>Myxococcales</i> )           |          |   |   |    |                                                       |           |    |
| 12 methane_3-47                   | LC171324 | 0 | 0 | 1  | Marine tidal mat                                      | AY193162  | 95 |
| 12 methane_14                     | LC171305 | 0 | 0 | 1  | Coastal sediment                                      | GU230393  | 91 |
| 12 methane_09                     | LC171303 | 0 | 0 | 1  | Arctic pack ice                                       | AF468246  | 99 |
| 12 methane_1-30                   | LC171293 | 0 | 0 | 1  | Gut of <i>S. crosnieri</i>                            | AB980107  | 94 |
| <b><i>Bacteroidetes</i></b>       |          |   |   |    |                                                       |           |    |
| ( <i>Cyclobacteriaceae</i> )      |          |   |   |    |                                                       |           |    |
| 3 methane_1-01                    | LC171266 | 0 | 1 | 0  | Inactive chimney from East Pacific Rise               | JQ287020  | 99 |
| ( <i>Flavobacteriaceae</i> )      |          |   |   |    |                                                       |           |    |
| 12 methane_1-23                   | LC171291 | 0 | 5 | 10 | <i>Maribacter</i> sp. BSw21903                        | JQ069963  | 99 |
| 3 methane_2-21                    | LC171276 | 0 | 1 | 0  | <i>Pibocella ponti</i>                                | NR_025821 | 97 |
| 3 methane_1-45                    | LC171272 | 0 | 2 | 0  | <i>Psychroserpens</i> sp. PAMC 27104                  | KJ475158  | 99 |
| 12 methane_06                     | LC171300 | 0 | 0 | 3  | methane seep sediments                                | FM179907  | 90 |
| 3 methane_1-07                    | LC171267 | 0 | 3 | 0  | <i>Arcticiflavibacter luteus</i>                      | KF711856  | 99 |
| 3 methane_1-13                    | LC171270 | 0 | 4 | 0  | <i>Winogradskyella damuponensis.</i>                  | NR_109095 | 98 |
| 12 methane_08                     | LC171302 | 0 | 0 | 1  | Seafloor basalt                                       | KT748595  | 97 |
| ( <i>Schleiferiaceae</i> )        |          |   |   |    |                                                       |           |    |
| 12 methane_1-45                   | LC171296 | 0 | 0 | 1  | Macroalgal surface                                    | GU451471  | 96 |
| ( <i>Saprospiraceae</i> )         |          |   |   |    |                                                       |           |    |
| 12 methane_3-14                   | LC171318 | 0 | 0 | 1  | Abdominal tuft of <i>Pestarella tyrrhena</i>          | DQ890438  | 97 |
| 12 methane_1-41                   | LC171295 | 0 | 0 | 3  | Microbial mat from shallow hydrothermal vent          | HQ153931  | 94 |

|                             |          |    |     |     |                                                    |          |    |
|-----------------------------|----------|----|-----|-----|----------------------------------------------------|----------|----|
| 12 methane_24               | LC171310 | 0  | 0   | 1   | Marine biofilms                                    | JF272143 | 92 |
| 12 methane_3-17             | LC171319 | 0  | 1   | 1   | Macroalgal surface                                 | GU451380 | 95 |
| 12 methane_3-21             | LC171322 | 0  | 0   | 1   | Antarctic sea water                                | GU235293 | 99 |
| 12 methane_1-07             | LC171284 | 0  | 0   | 10  | Macroalgal surface                                 | GU451530 | 99 |
| 12 methane_3-03             | LC171317 | 0  | 0   | 1   | Seawater from<br>marineland for shrimp<br>and crab | JN119168 | 96 |
| 3 methane_1-12              | LC171269 | 0  | 6   | 0   | Atlantic Ocean                                     | FQ032814 | 94 |
| <i>(Sphingobacteriales)</i> |          |    |     |     |                                                    |          |    |
| 12 methane_15               | LC171306 | 0  | 1   | 1   | Atlantic Ocean                                     | FQ032816 | 99 |
| 12 methane_44               | LC171316 | 0  | 0   | 1   | Coastal seawater                                   | GQ347704 | 97 |
| <i>Planctomycetales</i>     |          |    |     |     |                                                    |          |    |
| 12 methane_1-11             | LC171288 | 0  | 0   | 1   | <i>S. crosnieri</i> epibiotic<br>community         | AB981888 | 96 |
| 3 methane_3-02              | LC171279 | 0  | 2   | 0   | Microbialites from<br>Alchichica lake              | JN825603 | 96 |
| <i>Verrucomicrobiales</i>   |          |    |     |     |                                                    |          |    |
| 3 methane_2-38              | LC171278 | 0  | 1   | 0   | <i>Verrucomicrobia</i><br>bacterium PAORIC-15      | KP030836 | 99 |
| <i>Gracilibacteria</i>      |          |    |     |     |                                                    |          |    |
| 12 methane_10               | LC171304 | 0  | 0   | 1   | Volcanic seamount                                  | FJ497648 | 94 |
| <i>Acidimicrobiales</i>     |          |    |     |     |                                                    |          |    |
| 12 methane_1-10             | LC171287 | 0  | 1   | 2   | Marine bulk water                                  | JX016574 | 99 |
| 12 methane_3-20             | LC171321 | 0  | 1   | 1   | Marine subsurface<br>sediment                      | KR825135 | 99 |
| 12 methane_35               | LC171312 | 0  | 0   | 1   | Marine sediment                                    | FJ716840 | 97 |
| 12 methane_40               | LC171315 | 0  | 0   | 1   | Surface water from<br>Bering Sea                   | GQ472798 | 98 |
| <b>Total</b>                |          | 98 | 116 | 128 |                                                    |          |    |
